# Supplementary material for: Extracellular vesicles engineering by silicates-activated endothelial progenitor cells for myocardial infarction treatment in male mice
Source: PubMed Central journal article supplement (PMC10102163; doi:10.1038/s41467-023-37832-y), 2023-04-13
Supplement: 41467_2023_37832_MOESM3_ESM.pdf [file 41467_2023_37832_MOESM3_ESM.pdf]

## **Description of Additional Supplementary Files**

**Supplementary Movie 1:** Fluorescence scanning through one Microsphere+EVs from top to bottom using a confocal laser scanning microscope, which shows the uniform distribution of extracellular vesicles within the microsphere. Microspheres (FITC-labeled, green fluorescence), EVs (PKH26-labeled, red fluorescence).
